# Supplementary material
Source: PubMed Central journal article supplement (PMC1538820)

**Supplementary Figure 3** Lack of correlation between expression levels and Accessibility scores, ACC(10), of promoters (-1000 to +100 relative to transcription start sites). Open circles, housekeeping gene (HK) promoters; dots, tissue-specific (TS) gene promoters. Correlation between accessibility scores and expression levels for HK genes = 0.116 (critical value for significance (0.05) = 0.168. Correlation between accessibility scores and expression levels for TS genes = 0.006 (critical value for significance (0.05) = 0.227.

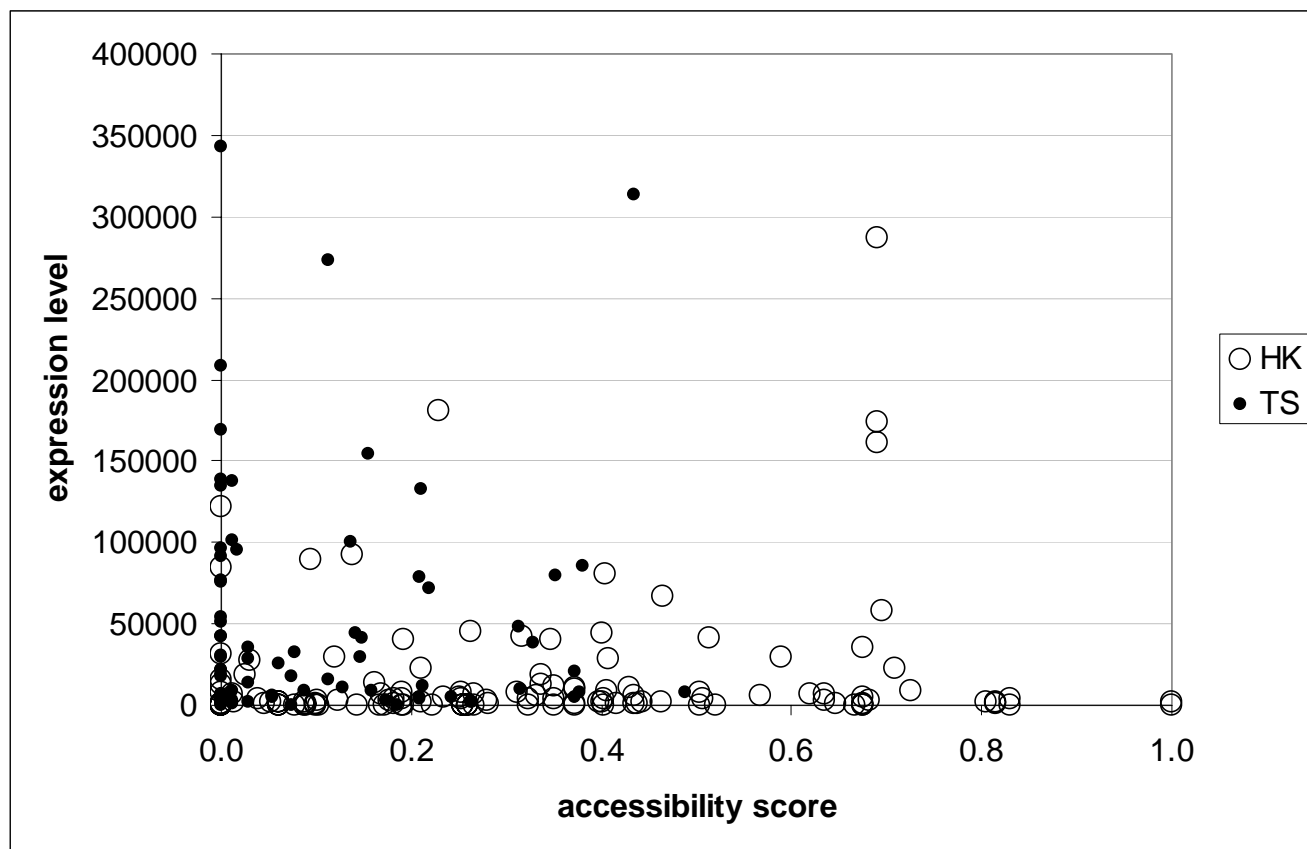

Supplement: nar_34_suppl-2_W560__1.pdf [file nar_34_suppl-2_W560__1.pdf]
